# Supplementary material
Source: publisher figshare collection journal article supplement (https://aacr.figshare.com/articles/dataset/_/22364301)
Supplement: Supplementary file 1 [file 39808563]

|     |    |   |   |   |   |   |   |   |   |   |   |   |   |   |   |   |   |   |   |   |   |   |   |   |   |   |   |   |   |   |   |   |   |   |   |   |   |   |   |   |   |   |   |   |   |   |   |    |    |    |    |
|-----|----|---|---|---|---|---|---|---|---|---|---|---|---|---|---|---|---|---|---|---|---|---|---|---|---|---|---|---|---|---|---|---|---|---|---|---|---|---|---|---|---|---|---|---|---|---|---|----|----|----|----|
|     |    | ↓ | ↓ |   | ↓ |   | ↓ | ↓ | ↓ | ↓ | ↓ |   |   |   |   |   |   |   |   |   |   |   |   |   |   |   |   |   |   |   |   |   |   |   |   |   |   |   |   |   |   |   |   |   |   |   |   |    |    |    |    |
| Hs1 | 1- | C | V | F | C | R | N | N | K | E | A | A | L | Y | T | T | H | I | L | K | G | D | G | R | V | L | C | P | V | L | R | Y | T | C | P | L | C | G | A | S | G | N | A | H | T | I | K | Y  | C  | -  | 52 |
| Mm1 | 1- | C | V | F | C | R | N | N | K | E | A | A | L | Y | T | T | H | I | L | K | G | D | G | R | V | L | C | P | V | L | R | Y | T | C | P | L | C | G | A | S | G | N | A | H | T | I | K | Y  | C  | -  | 52 |
| Rn1 | 1- | C | V | F | C | R | N | N | K | E | A | A | L | Y | T | T | H | I | L | K | G | D | G | R | V | L | C | P | V | L | R | Y | T | C | P | L | C | G | A | S | G | N | A | H | T | I | K | Y  | C  | -  | 52 |
| Hs2 | 1- | C | N | F | C | K | H | N | G | E | S | H | V | Y | T | S | H | Q | L | K | T | E | G | V | V | C | P | I | L | R | Y | V | C | P | L | C | G | A | T | G | O | A | H | T | L | K | Y | C  | -  | 52 |    |
| Mm2 | 1- | C | N | F | C | K | H | N | G | E | S | H | V | Y | T | S | H | Q | L | K | T | E | G | V | V | C | P | I | L | R | Y | V | C | P | L | C | G | A | T | G | O | A | H | T | L | K | Y | C  | -  | 52 |    |
| Rn2 | 1- | C | N | F | C | K | H | N | G | E | S | H | V | Y | T | S | H | Q | L | K | T | E | G | V | V | C | P | I | L | R | Y | V | C | P | L | C | G | A | T | G | O | A | H | T | L | K | Y | C  | -  | 52 |    |
| Hs3 | 1- | C | S | F | C | K | H | N | G | E | S | A | I | Y | Q | S | H | V | L | K | D | A | G | R | V | L | C | P | I | L | R | Y | V | C | P | Q | C | G | A | T | R | R | A | H | T | R | R | F  | C  | -  | 52 |
| Mm3 | 1- | C | S | F | C | K | H | N | G | E | S | A | I | Y | Q | S | H | V | L | K | D | A | G | R | V | L | C | P | I | L | R | Y | V | C | P | Q | C | G | A | T | O | H | A | H | T | R | R | F  | C  | -  | 52 |
| Rn3 | 1- | C | S | F | C | K | H | N | G | E | S | A | I | Y | Q | S | H | V | L | K | D | A | G | R | V | L | C | P | I | L | R | Y | V | C | P | Q | C | G | A | T | O | H | A | H | T | R | R | F  | C  | -  | 52 |
| Xl  | 1- | C | G | F | C | R | S | N | R | E | A | S | L | Y | T | S | H | R | L | R | A | D | G | R | V | L | C | P | V | L | R | Y | T | C | P | L | C | G | A | N | C | A | H | T | M | R | Y | C  | -  | 52 |    |
| Cs  | 1- | C | V | F | C | R | N | N | G | A | D | I | L | Y | K | S | H | T | V | K | D | K | G | R | V | L | C | P | K | L | R | Y | C | P | I | C | G | A | D | G | O | S | H | T | V | K | Y | C  | -  | 52 |    |
| Dm  | 1- | C | V | F | C | E | N | N | D | P | A | V | I | N | S | H | S | V | R | D | F | N | R | V | L | C | P | K | L | R | Y | V | C | P | I | C | G | A | S | C | S | A | H | T | I | K | Y | C  | -  | 52 |    |
| Dr1 | 1- | C | V | F | C | R | N | N | G | A | P | E | V | Y | G | S | H | V | L | K | T | D | G | R | V | C | P | I | L | R | Y | T | C | X | L | C | S | A | N | C | A | H | T | I | X | Y | C | -  | 52 |    |    |
| Dr2 | 1- | C | S | F | C | K | H | N | G | E | T | A | Y | T | S | H | Y | L | K | N | D | C | D | V | M | C | P | L | R | Y | K | C | P | L | C | G | A | T | C | K | A | H | T | K | R | F | C | -  | 52 |    |    |
| Ds  | 1- | C | V | F | C | E | N | N | D | P | A | V | I | N | S | H | S | V | R | D | F | N | R | V | L | C | P | K | L | R | Y | V | C | P | I | C | G | A | S | C | S | A | H | T | I | K | Y | C  | -  | 52 |    |
| Dv  | 1- | C | V | F | C | E | N | N | D | P | A | V | N | S | H | T | V | R | D | Y | G | R | V | L | C | P | K | L | R | Y | V | C | P | I | C | G | A | S | C | S | A | H | T | I | K | Y | C | -  | 52 |    |    |
| Hm1 | 1- | C | V | F | C | R | N | N | G | E | S | E | F | Y | S | S | H | T | L | K | D | E | G | N | T | C | P | I | L | R | Y | T | C | P | L | O | K | A | S | G | O | S | H | T | I | K | Y | C  | -  | 52 |    |
| Hm2 | 1- | C | V | F | C | R | N | N | G | E | S | N | V | Y | A | S | H | V | L | K | D | D | G | R | T | S | C | P | I | L | R | Y | T | C | P | I | O | K | A | N | G | N | S | H | T | I | K | Y  | C  | -  | 52 |
| Hr  | 1- | C | V | F | C | R | N | N | K | E | P | C | V | A | N | S | H | L | V | K | D | K | G | V | T | C | P | I | L | Y | T | C | P | I | C | G | A | T | C | A | H | T | I | K | Y | C | - | 52 |    |    |    |
| Md  | 1- | C | V | F | C | E | N | N | D | P | A | V | K | S | H | A | V | R | D | M | G | R | V | L | C | P | K | L | R | Y | I | C | P | I | O | K | A | S | G | K | A | H | T | V | K | Y | C | -  | 52 |    |    |
| Nv1 | 1- | C | V | F | C | R | N | N | G | E | S | K | V | Y | S | S | H | V | L | K | D | E | G | N | T | C | P | I | L | R | Y | T | C | P | L | O | K | A | S | G | O | S | H | T | I | K | Y | C  | -  | 52 |    |
| Nv2 | 1- | C | V | F | C | R | N | N | G | E | S | E | V | Y | A | S | H | V | L | K | S | D | G | K | T | T | C | P | I | L | R | Y | T | C | P | I | O | K | A | S | G | D | S | H | T | I | K | Y  | C  | -  | 52 |
| Pc1 | 1- | C | V | F | C | R | N | N | G | E | S | E | F | Y | S | S | H | T | L | K | D | E | G | N | T | C | P | I | L | R | Y | T | C | P | L | O | K | A | N | G | N | S | H | T | V | K | Y | C  | -  | 52 |    |
| Pc2 | 1- | C | V | F | C | R | N | N | G | E | S | S | V | Y | T | S | H | V | L | K | D | D | G | R | T | A | C | P | I | L | R | Y | T | C | P | I | O | K | A | N | G | N | S | H | T | I | K | Y  | C  | -  | 52 |
| Ce3 | 1- | C | Y | R | G | E | H | Y | Q | L | P | E | E | V | S | S | H | N | I | R | K | N | G | D | L | C | E | H | M | K | I | K | C | G | H | C | E | A | T | G | O | G | H | P | L | I | C | -  | 52 |    |    |
